# Supplementary material for: Intrinsic capacity differs from functional ability in predicting 10-year mortality and biological features in healthy aging: results from the I-Lan longitudinal aging study
Source: publisher site journal article supplement (doi:10.18632/aging.204508), 2023-02-06
Supplement: Supplementary file [file aging-v15i3-204508-supplementary-material-SD1.pdf]

## SUPPLEMENTARY FIGURES

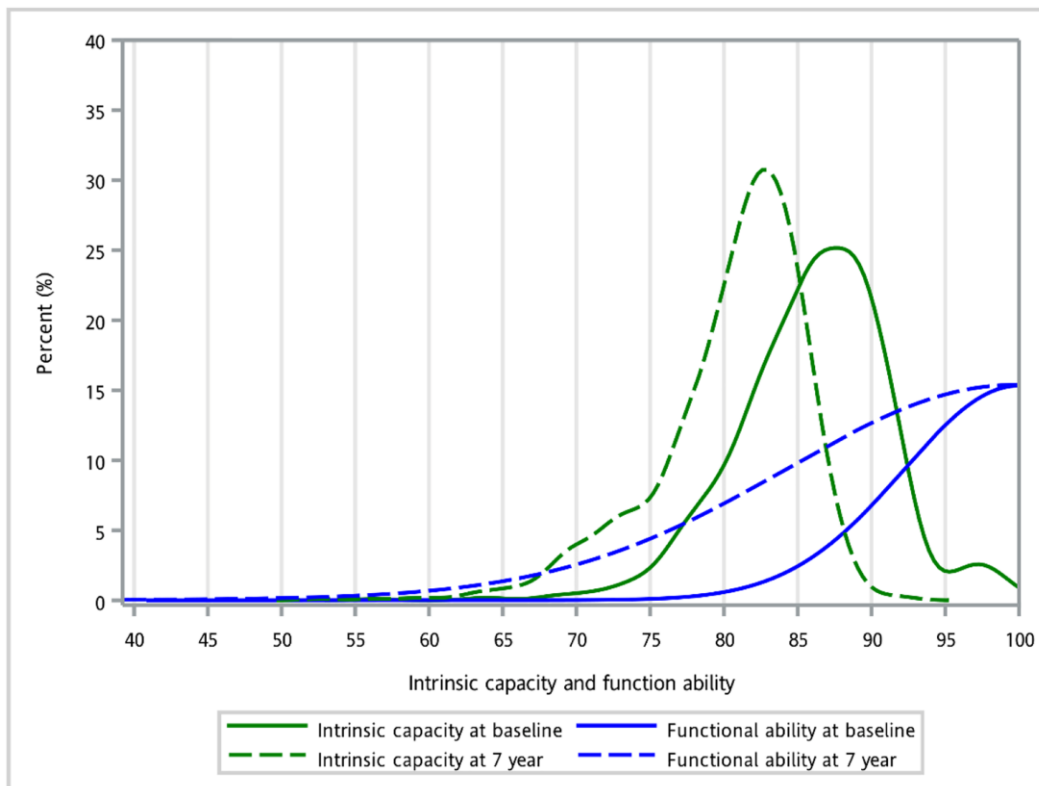

Supplementary Figure 1. Distribution of baseline and 7-year intrinsic capacity and functional ability.

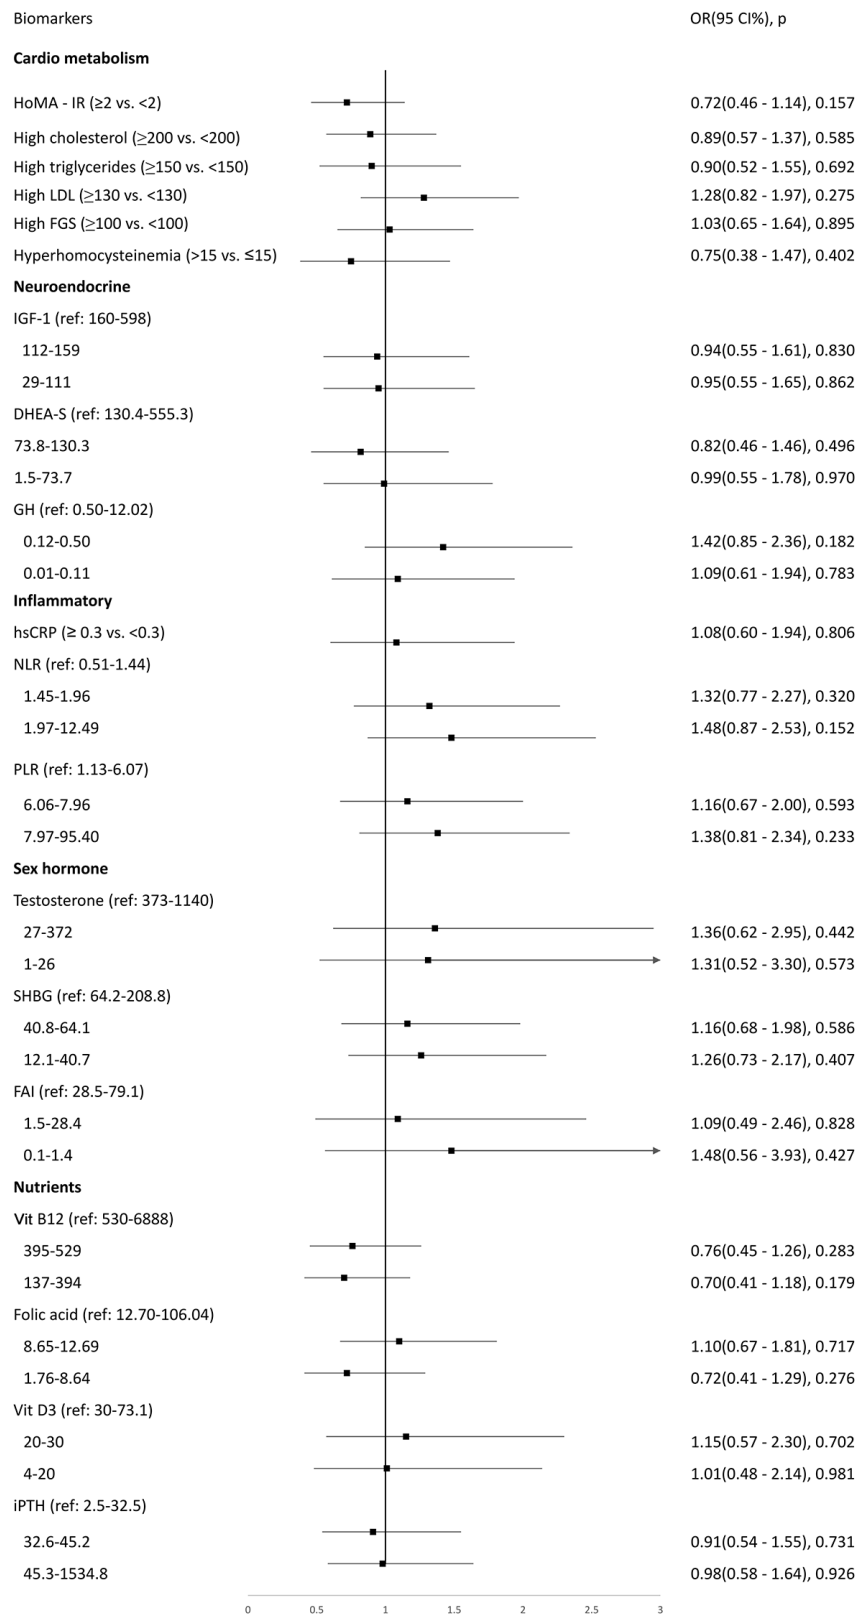

Supplementary Figure 2. Logistic regression to explore biomarkers associated with maintained and improved intrinsic capacity at a 7-year follow up period.
